# Supplementary material
Source: publisher figshare collection journal article supplement (https://tandf.figshare.com/articles/dataset/_/5106211)
Supplement: Supplementary file 3 [file 2]

# Effect of Parental Migration on the Academic Performance of Left-behind Children in Northwestern China

## Supplementary Materials 1. Appendix Table and Figure.

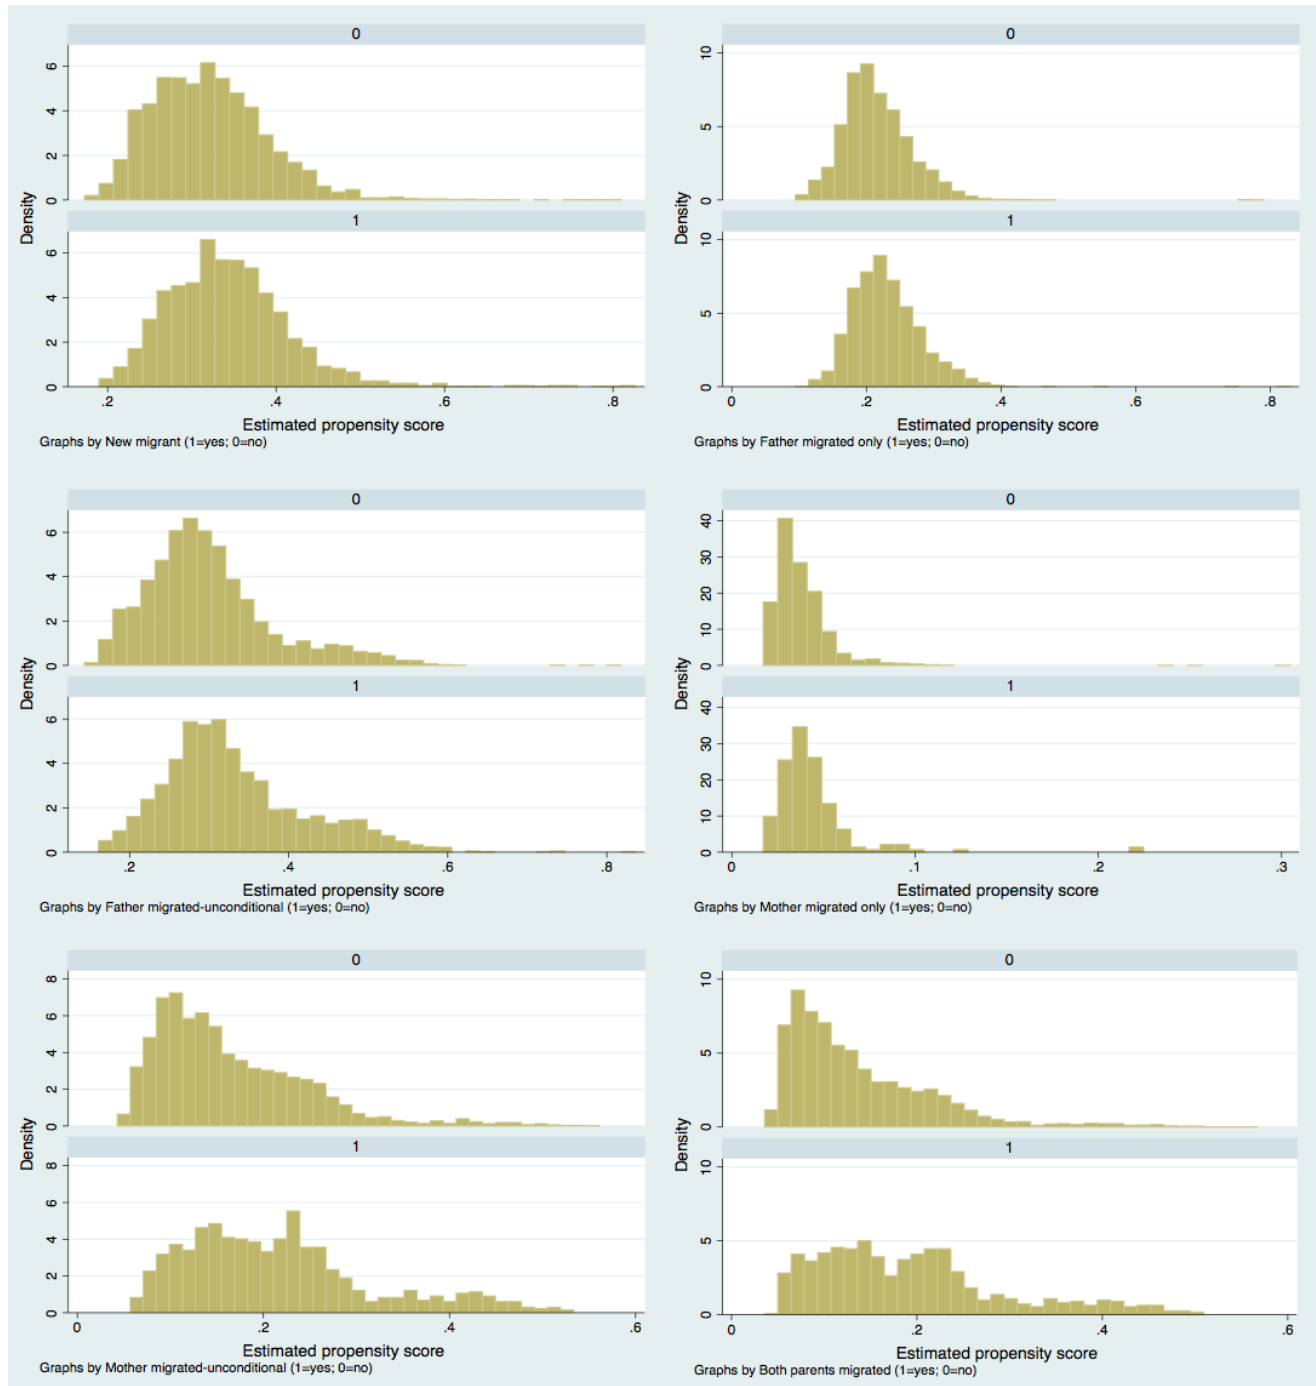

Appendix Figure. 1 Overlap in the support of the covariates between the six different types of *New Migrant* households and *Never Migrant* households.

**Appendix Table 1. Definition of different types of migrant households.**

| Migration status<br>(key independent variable name) | Definition                                                                                                                                                                      |
|-----------------------------------------------------|---------------------------------------------------------------------------------------------------------------------------------------------------------------------------------|
| [1] Any Parent Migrated                             | Households in which both parents lived at home by September 2013 and at least on parent – either the father, mother or both parents – out-migrated by June 2014                 |
| [2] Father Migrated Only                            | Households in which only the father out-migrated by June 2014 but was at home by September 2013                                                                                 |
| [3] Father Migrated (Unconditional)                 | Households in which the father was at home by September 2013 but out-migrated by June 2014 (including households in which the mother was either at home or not at home in 2014) |
| [4] Mother Migrated Only                            | Households in which only the mother out-migrated by June 2014 but was at home by September 2013                                                                                 |
| [5] Mother Migrated (Unconditional)                 | Households in which the mother was at home by September 2013 but out-migrated by June 2014 (including households in which the father was either at home or not at home in 2014) |
| [6] Both Parents Migrated                           | Households in which both parents were at home by September 2013, but out-migrated by June 2014                                                                                  |
